# Supplementary material
Source: MDPI journal article supplement (https://www.mdpi.com/2073-4395/11/11/2108)
Supplement: s1 [file s1]

Archive with 4 entries (4 files):
- Supplementary Material Table S3.xlsx
- Supplementary Material Table S4.xlsx
- Supplementary Material Word file.xlsx
- Supplementary Materials-description.pdf
