# Supplementary material
Source: MDPI journal article supplement (https://www.mdpi.com/2073-4395/11/11/2108)
Supplement: s1 [file s1 › Supplementary Material Table S3.xlsx]

## Sheet: Relevant articles
Reference	Title	Crop yields (soybean growth, harvest index, biomass, grain yield, thousand seed weight (TKW) etc)	Soil fertility: nutrients use efficiency (in biomass, availability, uptake etc), macro-micronutrients in soil/plant	Soil fertility: pH	Soil Carbon (SOC, SOM)	Carbon sequestration	Greenhouse gas fluxes (CO2; CH4; N2O)	Soil biological properties: microorganisms (Microbial biomass; soil fauna, enzyme activity, bacterial/fungi colony, bacterial community, abundance, mycorrhizal fungi etc)	Nutrients leaching, eosion: runoff, sediment loss, nutrient loss, soil off etc.	Soil moisture/available water/water use efficiency/water condition/retention/capacity/soil water content.. etc...	Heavy metals (Hg, Cd, Pb, Cu, other) in soil and plant: immobilization, inactivation etc
Jin et al. 2020	Investigations of the effect of the amount of biochar on soil porosity and aggregation and crop yields on fertilized black soil in northern China	X			X
Liu et al. 2020	Influences of rice straw biochar and organic manure on forage soybean nutrient and Cd uptake	X	X								X
Mehmood et al. 2020	Chitosan Modified Biochar Increases Soybean (Glycine max L.) Resistance to Salt-Stress by Augmenting Root Morphology, Antioxidant Defense Mechanisms and the Expression of Stress-Responsive Genes	X	X
Jabborova et al. 2020	Co-Inoculation of Rhizobacteria and Biochar Application Improves Growth and Nutrients in Soybean and Enriches Soil Nutrients and Enzymes	X	X					X
Li et al. 2020	Short-term influence of biochar on soil temperature, liquid moisture content and soybean growth in a seasonal frozen soil area	X								X
Bashagaluke et al. 2020	Nutrient uptake and productivity of four tropical cropping systems under biochar amendment	X	X
Nurida et al. 2020	Amelioration of Acid Upland to Increase Soil Productivity and Soybean Yield			X						X
Basalirwa et al. 2020	Effect of activated carbon on greenhouse gas emissions, seed yield, soil chemical properties and isoflavone content of soybean genotypes with varying nodulation capacities under sandy soil conditions	X	X	X	X		X
Zhang et al. 2020	Biochar addition alleviate the negative effects of drought and salinity stress on soybean productivity and water use efficiency	X								X
Jahan et al. 2020	Efficacy of biochar as soil amendments for soybean (Glycine max L.) morphology, physiology, and yield regulation under drought	X								X
Liu et al. 2020	Effects of Corn Straw Biochar Application on Soybean Growth and Alkaline Soil Properties	X	X	X	X					X
Li et al. 2020	Effects of different biochar application methods on soybean growth indicator variability in a seasonally frozen soil area	X								X
Alam et al. 2020	Optimizing application of biochar, compost and nitrogen fertilizer in soybean intercropping with kayu putih (Melaleuca cajuputi)	X
Ma et al. 2019	Effect of Biochar and Irrigation on the Interrelationships among Soybean Growth, Root Nodulation, Plant P Uptake, and Soil Nutrients in a Sandy Field	X	X	X	X					X
Ma et al. 2019	Effect of Biochar and Irrigation on Soybean-Rhizobium Symbiotic Performance and Soil Enzymatic Activity in Field Rhizosphere							X
Liu et al. 2019	EFFECTS OF INTERACTION OF BIOCHAR AND NITROGEN FERTILIZER ON GROWTH, YIELD AND YIELD COMPONENTS OF SOYBEAN	X	X	X
Liu et al. 2019	Impact of biochar amendment on the abundance and structure of diazotrophic community in an alkaline soil		X		X			X
Gavili et al. 2019	Integrated effects of cattle manure-derived biochar and soil moisture conditions on soil chemical characteristics and soybean yield	X	X							X
Zhu et al. 2019	Effect of biochar on grain yield and leaf photosynthetic physiology of soybean cultivars with different phosphorus efficiencies	X
Asfaw et al. 2019	Coffee-husk biochar application increased AMF root colonization, P accumulation, N-2 fixation, and yield of soybean grown in a tropical Nitisol, southwest Ethiopia	X	X					X
Mohamed et al. 2019	Cadmium immobilization and alleviation of its toxicity for soybean grown in a clay loam contaminated soil using sugarcane bagasse-derived biochar	X	X								X
Taskin et al. 2019	Effect of Acid Modified Biochar on the Growth and Essential and Non- Essential Element Content of Bean, Chickpea, Soybean, and Maize Grown in Calcareous Soil	X
Liu et al. 2019	Insight into the correlation between biochar amendment and shifts in bacterial community 4 years after a single incorporation in soybean- and maize-planted soils in northeastern China							X
Katterer et al. 2019	Biochar addition persistently increased soil fertility and yields in maize-soybean rotations over 10 years in sub-humid regions of Kenya	X	X	X	X	X				X
Jahan et al. 2019	Structural characterization of soil biochar amendments and their comparative performance under moisture deficit regimes	X	X	X						X
Zhang et al. 2019	Annual nitric and nitrous oxide emissions response to biochar amendment from an intensive greenhouse vegetable system in southeast China	X					X			X	X
Gavili et al. 2019	Does biochar mitigate the adverse effects of drought on the agronomic traits and yield components of soybean?	X								X
Xiu et al. 2019	Effects of biochar and straw returning on the key cultivation limitations of Albic soil and soybean growth over 2 years	X	X	X
Jin et al. 2019	EFFECT OF VARIOUS LEVELS OF BIOCHAR INCORPORATION ON SOYBEAN YIELDS, PHYSICAL QUALITY AND NITRIFYING BACTERIA OF BLACK SOIL IN NORTHEAST CHINA	X	X					X		X
Bashagaluke et al. 2018	Soil nutrient loss through erosion: Impact of different cropping systems and soil amendments in Ghana								X
Yu et al. 2018	Combined application of biochar and nitrogen fertilizer benefits nitrogen retention in the rhizosphere of soybean by increasing microbial biomass but not altering microbial community structure		X	X				X
Arabi et al. 2018	Effects of biochar and bio-fertilizer on yield and qualitative properties of soybean and some chemical properties of soil	X	X	X
Liu et al. 2018	Simultaneous measurement of bacterial abundance and composition in response to biochar in soybean field soil using 16S rRNA gene sequencing							X
Walters et al. 2018	Biochar In Situ Decreased Bulk Density and Improved Soil-Water Relations and Indicators in Southeastern US Coastal Plain Ultisols	X								X
Wang et al. 2018	Effects of bamboo biochar on soybean root nodulation in multi-elements contaminated soils	X	X	X							X
Yin et al. 2018	Biochar as Tool to Improve Physicochemical Properties of Chinese Albic Soils	X	X	X	X					X
Major et al. 2010	Maize yield and nutrition during 4 years after biochar application to a Colombian savanna oxisol	X	X	X
Van Zwieten et al. 2010	Effects of biochar from slow pyrolysis of papermill waste on agronomic performance and soil fertility	X	X	X	X						X
Major et al. 2012	Nutrient Leaching in a Colombian Savanna Oxisol Amended with Biochar								X
Suppadit et al. 2012	THE EFFECT OF USING QUAIL LITTER BIOCHAR ON SOYBEAN (Glycine max [L.] Merr.) PRODUCTION	X	X	X	X						X
Masud et al. 2014	Use of Alkaline Slag and Crop Residue Biochars to Promote Base Saturation and Reduce Acidity of an Acidic Ultisol	X	X	X
Waqas et al. 2014	Phytohormone-producing fungal endophytes and hardwood-derived biochar interact to ameliorate heavy metal stress in soybeans	X						X			X
Mukherjee et al. 2014	Effects of biochar and other amendments on the physical properties and greenhouse gas emissions of an artificially degraded soil	X	X	X	X		X			X
Mete et al. 2015	Synergistic Effects of Biochar and NPK Fertilizer on Soybean Yield in an Alkaline Soil	X		X
Keith et al. 2015	Biochar reduces the rhizosphere priming effect on soil organic carbon	X			X		X
Lee et al. 2015	Synergy effects of biochar and polyacrylamide on plants growth and soil erosion control	X	X						X	X
Iijima et al. 2015	Continuous Application of Biochar Inoculated with Root Nodule Bacteria to Subsoil Enhances Yield of Soybean by the Nodulation Control using Crack Fertilization Technique	X						X
Berek et al. 2016	Characterization of Biochars and Their Use as an Amendment to Acid Soils	X		X
Backer et al. 2016	Crop yield and SOC responses to biochar application were dependent on soil texture and crop type in southern Quebec, Canada	X	X	X	X
Egamberdieva et al. 2016	Biochar Treatment Resulted in a Combined Effect on Soybean Growth Promotion and a Shift in Plant Growth Promoting Rhizobacteria	X						X
Saxena et al. 2016	Enhancement of Growth and Yield of Glycine max Plants with Inoculation of Phosphate Solubilizing Fungus Aspergillus niger K7 and Biochar Amendment in Soil	X						X
Hairani et al. 2016	Effect of biochar application on mineral and microbial properties of soils growing different plant species	X									X
Wang et al. 2016	Biochar Application Promotes Growth Parameters of Soybean and Reduces the Growth Difference	X
Sanvong et al. 2016	The use of soybean plants to evaluate the efficacy of broiler litter biochar as a treatment for cadmium contaminated soil										X
Obia et al. 2016	In situ effects of biochar on aggregation, water retention and porosity in light-textured tropical soils									X
Madari et al. 2017	Properties of a sandy clay loam Haplic Ferralsol and soybean grain yield in a five-year field trial as affected by biochar amendment	X	X	X	X					X
Sandhu et al. 2017	Analyzing the impacts of three types of biochar on soil carbon fractions and physiochemical properties in a corn-soybean rotation		X	X	X					X
Aller et al. 2017	Biochar Age and Crop Rotation Impacts on Soil Quality		X	X	X					X
Sandhu et al. 2017	Impact of Three Types of Biochar on the Hydrological Properties of Eroded and Depositional Landscape Positions									X
Hafeez et al. 2017	EFFECT OF BIOCHAR APPLICATION ON SEED GERMINATION AND SEEDLING GROWTH OF GLYCINE MAX (L.) MERR. UNDER DROUGHT STRESS	X								X
Scheifele et al. 2017	Impact of pyrochar and hydrochar on soybean (Glycine max L.) root nodulation and biological nitrogen fixation	X	X	X				X
Yu et al. 2017	Combined biochar and nitrogen fertilizer reduces soil acidity and promotes nutrient use efficiency by soybean crop	X	X	X	X
Dokht et al. 2017	Effects of sewage sludge and its biochar on soybean yield in fine-textured loess soil	X	X
Waqas et al. 2017	Additive effects due to biochar and endophyte application enable soybean to enhance nutrient uptake and modulate nutritional parameters		X		X
Liu et al. 2017	Biochar amendments increase the yield advantage of legume-based intercropping systems over monoculture	X	X					X
Jing et al. 2017	Biochar Functions as Phosphorous Fertilizers in an Alkaline Alluvial Soil	X	X	X
Reyes-Cabrera et al. 2017	Biochar Changes Shoot Growth and Root Distribution of Soybean during Early Vegetative Stages	X
Koga et al. 2017	Biochar Impacts on Crop Productivity and Greenhouse Gas Emissions from an Andosol	X		X			X			X
Zhang et al. 2017	Sulfur-enriched biochar as a potential soil amendment and fertiliser	X	X
In total: 69 articles		n=55	n=37	n=27	n=17	n=1	n=5	n=14	n=3	n=24

## Sheet: Excluded
Reference	Title	Excluded	comments
Vyavahare et al. 2021	Sorption of brilliant green dye using soybean straw-derived biochar: characterization, kinetics, thermodynamics and toxicity studies	Study evaluated the effectiveness of biochar derived from soybean residues
Sui et al. 2021	Investigating the cadmium adsorption capacities of crop straw biochars produced using various feedstocks and pyrolysis temperatures	Study evaluated the effectiveness of biochar derived from soybean residues
Wu et al. 2021	Carbon sequestration under different organic amendments in saline-alkaline soils	Study evaluated the effectiveness of biochar derived from soybean residues
Xiu et al. 2021	Heat Storage Capacity and Temporal-spatial Response in the Soil Temperature of Albic Soil Amended with Maize-derived Biochar for 2 Years	Out of scope - a study not related to our work
Zhu et al. 2020	In-situ formed N-doped bamboo-like carbon nanotubes encapsulated with Fe nanoparticles supported by biochar as highly efficient catalyst for activation of persulfate (PS) toward degradation of organic pollutants	Study evaluated the effectiveness of biochar derived from soybean residues
Lu et al. 2020	Enhanced Plant Restoration in Open-Pit Mines Using Maize Straw and Ultrasonically Pre-Treated Coal Fly Ash	Out of scope - a study not related to our work
Dumortier et al. 2020	Global land-use and carbon emission implications from biochar application to cropland in the United States	Out of scope - a study not related to our work	Modeling
Egamberdieva et al. 2020	Response of Soybean to Hydrochar-Based Rhizobium Inoculation in Loamy Sandy Soil	Out of scope - a study not related to our work
di Bitonto et al. 2020	Synthesis and characterization of nanostructured calcium oxides supported onto biochar and their application as catalysts for biodiesel production	Out of scope - a study not related to our work
Zhang et al. 2020	Material conversion, microbial community composition and metabolic functional succession during green soybean hull composting	Study evaluated the effectiveness of biochar derived from soybean residues
Li et al. 2020	Effect of biochar on Cd and pyrene removal and bacteria communities variations in soils with culturing ryegrass (Lolium perenne L.)	Study evaluated the effectiveness of biochar derived from soybean residues
Li et al. 2020	Dissolved Black Carbon Facilitates Photoreduction of Hg(II) to Hg(0) and Reduces Mercury Uptake by Lettuce (Lactuca sativa L.)	Study evaluated the effectiveness of biochar derived from soybean residues
Collett et al. 2020	Influence of Biochar Composition and Source Material on Catalytic Performance: The Carboxylation of Glycerol with CO(2)as a Case Study	Study evaluated the effectiveness of biochar derived from soybean residues
McLeod et al. 2020	Soil fertility constraints and management to increase crop yields in the dryland farming systems of Aceh, Indonesia	Out of scope - a study not related to our work
Matassa et al. 2020	Upcycling of biowaste carbon and nutrients in line with consumer confidence: the "full gas" route to single cell protein	Out of scope - a study not related to our work
Chen et al. 2020	The Impact of Surficial Biochar Treatment on Acute H2S Emissions during Swine Manure Agitation before Pump-Out: Proof-of-the-Concept	Out of scope - a study not related to our work
Li et al. 2020	Silica nanoparticles alleviate mercury toxicity via immobilization and inactivation of Hg(ii) in soybean (Glycine max)	Out of scope - a study not related to our work	other parameters were evaluated
Ali et al. 2020	Biofuels production from weed biomass using nanocatalyst technology	Study evaluated the effectiveness of biochar derived from soybean residues
Mendes et al. 2020	Role of raw feedstock and biochar amendments on sorption-desorption and leaching potential of three H-3- and C-14-labelled pesticides in soils	Study evaluated the effectiveness of biochar derived from soybean residues
da Luz Correa et al. 2020	Preparation of sulfonated carbon-based catalysts from murumuru kernel shell and their performance in the esterification reaction	Out of scope - a study not related to our work
Siggins et al. 2020	Pyrolysed waste materials show potential for remediation of trichloroethylene-contaminated water	Study evaluated the effectiveness of biochar derived from soybean residues
Chen et al. 2020	Enhanced Oil Adsorption and Nano-Emulsion Separation of Nanofibrous Aerogels by Coordination of Pomelo Peel-Derived Biochar	Out of scope - a study not related to our work
Turmuktini et al. 2020	Agronomic Characteristics and Nodules from Black Soybean Genotypes Due to Application Compost and Biochar as Sustainable Agriculture	Out of scope - a study not related to our work
Yamane et al. 2020	The crack fertilization technique effectively increases soybean production in upland fields converted from paddies	Out of scope - a study not related to our work
Hwang et al. 2020	Accumulation characteristics of endosulfan soil residues in soybean and reduction in their phytoavailability by treatment with powdered activated carbon	Out of scope - a study not related to our work
Zhang et al. 2020	Production of activated carbons from four wastes via one-step activation and their applications in Pb2+ adsorption: Insight of ash content	Study evaluated the effectiveness of biochar derived from soybean residues
Ayoob et al. 2020	Valorization of waste tires in the synthesis of an effective carbon based catalyst for biodiesel production from a mixture of non-edible oils	Out of scope/does not apply to our work
Khan et al. 2020	Biochar reduced the uptake of toxic heavy metals and their associated health risk via rice (Oryza sativa L.) grown in Cr-Mn mine contaminated soils	Study evaluated the effectiveness of biochar derived from soybean residues
Sarfaraz et al. 2020	Characterization and carbon mineralization of biochars produced from different animal manures and plant residues	Study evaluated the effectiveness of biochar derived from soybean residues
Wang et al. 2020	Synergistic effects and kinetics analysis of biochar with semi-coke during CO2 co-gasification	Study evaluated the effectiveness of biochar derived from soybean residues
Guo et al. 2020	A simple method for the synthesis of biochar nanodots using hydrothermal reactor	Study evaluated the effectiveness of biochar derived from soybean residues
Wang et al. 2020	Phosphogypsum as a novel modifier for distillers grains biochar removal of phosphate from water	Study evaluated the effectiveness of biochar derived from soybean residues
Wang et al. 2019	Microwave-assisted pyrolysis of vegetable oil soapstock: Comparative study of rapeseed, sunflower, corn, soybean, rice, and peanut oil soapstock	Out of scope - a study not related to our work
Dokoohaki et al. 2019	Where should we apply biochar?	Out of scope - a study not related to our work	Modelling
Egamberdieva et al. 2019	Soil Amendment With Different Maize Biochars Improves Chickpea Growth Under Different Moisture Levels by Improving Symbiotic Performance With Mesorhizobium ciceri and Soil Biochemical Properties to Varying Degrees	Other plant evaluated
He et al. 2019	Organic fertilizers have divergent effects on soil N2O emissions	Out of scope - a study not related to our work	soybean residues as an organic fertilizer
Khan et al. 2019	Managing Tillage Operation and Manure to Restore Soil Carbon Stocks in Wheat-Maize Cropping System	Out of scope - a study not related to our work	soybean residues as an organic fertilizer
Xu et al. 2019	Co-production of phenolic oil and CaO/char deoxidation catalyst via catalytic fast pyrolysis of phenol-formaldehyde resin with Ca(OH)(2)	Out of scope - a study not related to our work	evaluation of biodiesel production from soybean oil
Cusioli et al. 2019	Soybean hulls as a low-cost biosorbent for removal of methylene blue contaminant	Study evaluated the effectiveness of biochar derived from soybean residues
Seglah et al. 2019	Estimation and Efficient Utilization of Straw Resources in Ghana	Study evaluated the effectiveness of biochar derived from soybean residues
Ali et al. 2019	Biochars reduced the bioaccessibility and (bio)uptake of organochlorine pesticides and changed the microbial community dynamics in agricultural soils	Study evaluated the effectiveness of biochar derived from soybean residues
Zheng et al. 2019	Comparing electron donating/accepting capacities (EDC/EAC) between crop residue-derived dissolved black carbon and standard humic substances	Study evaluated the effectiveness of biochar derived from soybean residues
Peiris et al. 2019	The influence of three acid modifications on the physicochemical characteristics of tea-waste biochar pyrolyzed at different temperatures: a comparative study	Out of scope - a study not related to our work
Sun et al. 2019	Biochar and fulvic acid to activate soil fertility for achieving agro-ecology benefits in a newly reclaimed coastal wetland of China	Other plant evaluated
Hu et al. 2019	Influence of the Pyrolytic Temperature and Feedstock on the Characteristics and Naphthalene Adsorption of Crop Straw-derived Biochars	Study evaluated the effectiveness of biochar derived from soybean residues
Wu et al. 2019	Sorption, degradation and bioavailability of oxyfluorfen in biochar-amended soils	Out of scope - a study not related to our work	other parameters were evaluated
Chen et al. 2019	Development of a novel bio-organic fertilizer for the removal of atrazine in soil	Out of scope - a study not related to our work	other parameters were evaluated
Li et al. 2019	Optimization of combined phytoremediation for heavy metal contaminated mine tailings by a field-scale orthogonal experiment	Out of scope - a study not related to our work	soybean used for phytoremediation
Yin et al. 2019	Hierarchical porous biochar-based functional materials derived from biowaste for Pb(II) removal	Study evaluated the effectiveness of biochar derived from soybean residues
Ali et al. 2019	Influence of biochars on the accessibility of organochlorine pesticides and microbial community in contaminated soils	Study evaluated the effectiveness of biochar derived from soybean residues
Zheng et al. 2019	Straw biochar increases the abundance of inorganic phosphate solubilizing bacterial community for better rape (Brassica napus) growth and phosphate uptake	Study evaluated the effectiveness of biochar derived from soybean residues
Liu et al. 2019	Soybean protein hydrolysate-formaldehyde-urea block copolymer for controlled release fertilizer	Out of scope - a study not related to our work	other parameters were evaluated
Han et al. 2019	Optimum biochar preparations enhance phosphorus availability in amended Mollisols of Northeast China	Study evaluated the effectiveness of biochar derived from soybean residues
Hu et al. 2019	LaMnO3 nanoparticles supported on N doped porous carbon as efficient photocatalyst	Study evaluated the effectiveness of biochar derived from soybean residues
Wang et al. 2019	Synthesis of calcium materials in biochar matrix as a highly stable catalyst for biodiesel production	Out of scope - a study not related to our work	evaluation of biodiesel production from soybean oil
Ali 2018	Effect of Plant Residues Derived Biochar on Fertility of a new Reclaimed Sandy Soil and Growth of Wheat (Triticum aestivum L.)	Study evaluated the effectiveness of biochar derived from soybean residues
Dokoohaki et al. 2018	Use of inverse modelling and Bayesian optimization for investigating the effect of biochar on soil hydrological properties	Out of scope - a study not related to our work	Modeling
Zhao et al. 2018	Biodiesel production by a highly effective renewable catalyst from pyrolytic rice husk	Out of scope - a study not related to our work
Trabelsi et al. 2018	Second generation biofuels production from waste cooking oil via pyrolysis process	Out of scope - a study not related to our work	evaluation of biodiesel production from soybean oil
Aller et al. 2018	Long term biochar effects on corn yield, soil quality and profitability in the US Midwest	Out of scope - a study not related to our work	Modeling
Wang et al. 2018	Ex-situ catalytic upgrading of vapors from fast microwave-assisted co-pyrolysis of Chromolaena odorata and soybean soapstock	Out of scope - a study not related to our work	soybena residues used in catalyst
Zhu et al. 2018	Effects of biochar on seedling root growth of soybeans	Out of scope - a study not related to our work	other parameters were evaluated
Schreiter et al. 2018	Sorption mechanisms of chlorinated hydrocarbons on biochar produced from different feedstocks: Conclusions from single- and bi-solute experiments	Study evaluated the effectiveness of biochar derived from soybean residues
Farhangi-Abriz et al. 2018	Biochar improved nodulation and nitrogen metabolism of soybean under salt stress	Out of scope - a study not related to our work	other parameters were evaluated
Rajapaksha et al. 2018	Removal of hexavalent chromium in aqueous solutions using biochar: Chemical and spectroscopic investigations	Study evaluated the effectiveness of biochar derived from soybean residues
Kumar et al. 2018	Biochar aging in contaminated soil promotes Zn immobilization due to changes in biochar surface structural and chemical properties	Study evaluated the effectiveness of biochar derived from soybean residues
Li et al. 2018	Biochars induced modification of dissolved organic matter (DOM) in soil and its impact on mobility and bioaccumulation of arsenic and cadmium	Study evaluated the effectiveness of biochar derived from soybean residues
Niazi et al. 2018	Arsenic removal by Japanese oak wood biochar in aqueous solutions and well water: Investigating arsenic fate using integrated spectroscopic and microscopic techniques	Out of scope - a study not related to our work
Jing et al. 2018	Kinetic and isothermal adsorption-desorption of PAEs on biochars: effect of biomass feedstock, pyrolysis temperature, and mechanism implication of desorption hysteresis	Out of scope - a study not related to our work
Speratti et al. 2018	Biochars from local agricultural waste residues contribute to soil quality and plant growth in a Cerrado region (Brazil) Arenosol	Other plant evaluated
Kang et al. 2018	Effect of biochar particle size on hydrophobic organic compound sorption kinetics: Applicability of using representative size	Out of scope - a study not related to our work
Weldekidan et al. 2018	Waste to Energy Conversion of Chicken Litter through a Solar-Driven Pyrolysis Process	Out of scope - a study not related to our work
Yin et al. 2018	Application of Mg-Al-modified biochar for simultaneous removal of ammonium, nitrate, and phosphate from eutrophic water	Study evaluated the effectiveness of biochar derived from soybean residues
Rizzuti et al. 2018	Utilising highly characterised peats to remove cadmium from aqueous solutions	Out of scope - a study not related to our work
Niazi et al. 2018	Arsenic removal by perilla leaf biochar in aqueous solutions and groundwater: An integrated spectroscopic and microscopic examination	Out of scope - a study not related to our work
Boateng et al. 2010	Sustainable Production of Bioenergy and Biochar from the Straw of High-Biomass Soybean Lines via Fast Pyrolysis	Study evaluated the effectiveness of biochar derived from soybean residues
Busscher et al. 2011	Physical Effects of Organic Matter Amendment of a Southeastern US Coastal Loamy Sand	Out of scope - a study not related to our work	soybean residues as an organic fertilizer
Kong et al. 2011	Cosorption of Phenanthrene and Mercury(II) from Aqueous Solution by Soybean Stalk-Based Biochar	Study evaluated the effectiveness of biochar derived from soybean residues
Xu et al. 2011	Adsorption of methyl violet from aqueous solutions by the biochars derived from crop residues	Study evaluated the effectiveness of biochar derived from soybean residues
Tong et al. 2011	Adsorption of Cu(II) by biochars generated from three crop straws	Study evaluated the effectiveness of biochar derived from soybean residues
Yuan et al. 2011	Comparison of the ameliorating effects on an acidic ultisol between four crop straws and their biochars	Study evaluated the effectiveness of biochar derived from soybean residues
Yuan et al. 2011	Amendment of Acid Soils with Crop Residues and Biochars	Study evaluated the effectiveness of biochar derived from soybean residues
Yuan et al. 2011	The amelioration effects of low temperature biochar generated from nine crop residues on an acidic Ultisol	Study evaluated the effectiveness of biochar derived from soybean residues
Yuan et al. 2011	The forms of alkalis in the biochar produced from crop residues at different temperatures	Study evaluated the effectiveness of biochar derived from soybean residues
Ahmad et al. 2012	Effects of pyrolysis temperature on soybean stover- and peanut shell-derived biochar properties and TCE adsorption in water	Study evaluated the effectiveness of biochar derived from soybean residues
Petter et al. 2012	Biochar: Agronomic and environmental potential in Brazilian savannah soils	Out of scope - a study not related to our work	review article
Karlen et al. 2012	Future Testing Opportunities to Ensure Sustainability of the Biofuels Industry	Out of scope - a study not related to our work	evaluation of biodiesel production from soybean oil
Ahmad et al. 2013	Modeling adsorption kinetics of trichloroethylene onto biochars derived from soybean stover and peanut shell wastes	Study evaluated the effectiveness of biochar derived from soybean residues
Moon et al. 2013	Immobilization of lead in contaminated firing range soil using biochar	Study evaluated the effectiveness of biochar derived from soybean residues
Pan et al. 2013	Adsorption of Cr(III) from acidic solutions by crop straw derived biochars	Study evaluated the effectiveness of biochar derived from soybean residues
Qian et al. 2013	Sorption of As(V) by Aluminum-Modified Crop Straw-Derived Biochars	Study evaluated the effectiveness of biochar derived from soybean residues
Tong et al. 2013	Removal of Cu(II) from acidic electroplating effluent by biochars generated from crop straws	Study evaluated the effectiveness of biochar derived from soybean residues
Leao et al. 2014	The addition of retorted oil shale increases carbon retention of plant residues in the soil	Out of scope - a study not related to our work
Singh et al. 2014	Characterization of Liquid Product Obtained by Pyrolysis of Cottonseed De-Oiled Cake	Out of scope - a study not related to our work	evaluation of biodiesel production from soybean oil
Wan et al. 2014	Pyrolysis temperature influences ameliorating effects of biochars on acidic soil	Study evaluated the effectiveness of biochar derived from soybean residues
Jiang et al. 2014	Effect of Crop-Straw Derived Biochars on Pb(II) Adsorption in Two Variable Charge Soils	Study evaluated the effectiveness of biochar derived from soybean residues
Ahmad et al. 2014	Speciation and phytoavailability of lead and antimony in a small arms range soil amended with mussel shell, cow bone and biochar: EXAFS spectroscopy and chemical extractions	Study evaluated the effectiveness of biochar derived from soybean residues
Khan et al. 2015	The influence of various biochars on the bioaccessibility and bioaccumulation of PAHs and potentially toxic elements to turnips (Brassica rapa L.)	Study evaluated the effectiveness of biochar derived from soybean residues
Liu et al. 2015	Characterization of biochars derived from agriculture wastes and their adsorptive removal of atrazine from aqueous solution: A comparative study	Study evaluated the effectiveness of biochar derived from soybean residues
Cheng et al. 2015	Carbon footprint of crop production in China: an analysis of National Statistics data	Out of scope - a study not related to our work	Modeling
Prakongkep et al. 2015	Forms and solubility of plant nutrient elements in tropical plant waste biochars	Study evaluated the effectiveness of biochar derived from soybean residues
Jung et al. 2015	Kinetic study on phosphate removal from aqueous solution by biochar derived from peanut shell as renewable adsorptive media	Study evaluated the effectiveness of biochar derived from soybean residues
Vithanage et al. 2015	Mechanisms of antimony adsorption onto soybean stover-derived biochar in aqueous solutions	Study evaluated the effectiveness of biochar derived from soybean residues
Vithanage et al. 2015	Acid-activated biochar increased sulfamethazine retention in soils	Study evaluated the effectiveness of biochar derived from soybean residues
Liu et al. 2015	Facile synthesis of mesoporous FeNi-alloyed carbonaceous microspheres as recyclable magnetic adsorbents for trichloroethylene removal	Study evaluated the effectiveness of biochar derived from soybean residues
Zhang et al. 2015	Adsorptive Removal of Trichloroethylene in Water by Crop Residue Biochars Pyrolyzed at Contrasting Temperatures: Continuous Fixed-Bed Experiments	Study evaluated the effectiveness of biochar derived from soybean residues
McCabe et al. 2016	Pelletized Soy-based Bioplastic Fertilizers for Container-crop Production	Out of scope - a study not related to our work	soybean residues as an organic fertilizer
Bakshi et al. 2016	Comparison of the Physical and Chemical Properties of Laboratory- and Field-Aged Biochars	Study evaluated the effectiveness of biochar derived from soybean residues
Beiyuan et al. 2016	Integrating EDDS-enhanced washing with low-cost stabilization of metal-contaminated soil from an e-waste recycling site	Study evaluated the effectiveness of biochar derived from soybean residues
Severini et al. 2016	Development of heterogeneous acid catalysts produced from the carbonization of Miscanthus x giganteus for the esterification of butyric acid to butyl butyrate with n-butanol	Out of scope - a study not related to our work	evaluation of biodiesel production from soybean oil
Tang et al. 2016	Spectroscopic characterization of dissolved organic matter derived from different biochars and their polycylic aromatic hydrocarbons (PAHs) binding affinity	Study evaluated the effectiveness of biochar derived from soybean residues
Herath et al. 2016	Mechanistic modeling of glyphosate interaction with rice husk derived engineered biochar	Study evaluated the effectiveness of biochar derived from soybean residues
Chen et al. 2016	Feasibility of biochar application on a landfill final cover-a review on balancing ecology and shallow slope stability	Study evaluated the effectiveness of biochar derived from soybean residues
Usman et al. 2016	Chemically modified biochar produced from conocarpus waste increases NO3 removal from aqueous solutions	Study evaluated the effectiveness of biochar derived from soybean residues
Ouyang et al. 2016	Typical agricultural diffuse herbicide sorption with agricultural waste-derived biochars amended soil of high organic matter content	Study evaluated the effectiveness of biochar derived from soybean residues
Chandrasekaran et al. 2016	Antioxidants from Slow Pyrolysis Bio-Oil of Birch Wood: Application for Biodiesel and Biobased Lubricants	Out of scope - a study not related to our work	evaluation of soybean oil for slow pyrolysis
Mukherjee et al. 2016	Dissipation of bentazone, pyrimethanil and boscalid in biochar and digestate based soil mixtures for biopurification systems	Out of scope - a study not related to our work
Ahmad et al. 2016	Impact of soybean stover- and pine needle-derived biochars on Pb and As mobility, microbial community, and carbon stability in a contaminated agricultural soil	Study evaluated the effectiveness of biochar derived from soybean residues
Ahmad et al. 2016	Lead and copper immobilization in a shooting range soil using soybean stover- and pine needle-derived biochars: Chemical, microbial and spectroscopic assessments	Study evaluated the effectiveness of biochar derived from soybean residues
Zhang et al. 2016	Preparation of nitrogen-doped microporous modified biochar by high temperature CO2-NH3 treatment for CO2 adsorption: effects of temperature	Study evaluated the effectiveness of biochar derived from soybean residues
Kostic et al. 2016	Optimization and kinetics of sunflower oil methanolysis catalyzed by calcium oxide-based catalyst derived from palm kernel shell biochar	Out of scope - a study not related to our work	evaluation of biodiesel production from soybean oil
Mendes et al. 2017	Evaluating Agricultural Management Effects on Alachlor Availability: Tillage, Green Manure, and Biochar	Study evaluated the effectiveness of biochar derived from soybean residues
Vithanage et al. 2017	Effects of carbon nanotube and biochar on bioavailability of Pb, Cu and Sb in multi-metal contaminated soil	Study evaluated the effectiveness of biochar derived from soybean residues
Mohamed et al. 2017	Interactive effects of biochar and micronutrients on faba bean growth, symbiotic performance, and soil properties	Study evaluated the effectiveness of biochar derived from soybean residues
Karunanithi et al. 2017	Sorption, kinetics and thermodynamics of phosphate sorption onto soybean stover derived biochar	Study evaluated the effectiveness of biochar derived from soybean residues
Farhangi-Abriz et al. 2017	Effect of lignite on alleviation of salt toxicity in soybean (Glycine max L.) plants	Out of scope - a study not related to our work	other parameters were evaluated
Lee et al. 2017	Sustainable approach to biodiesel synthesis via thermally induced transesterification using biochar as surrogate porous media	Out of scope - a study not related to our work	evaluation of biodiesel production from soybean oil
Wang et al. 2017	Transesterification of vegetable oil on low cost and efficient meat and bone meal biochar catalysts	Out of scope - a study not related to our work	evaluation of biodiesel production from soybean oil
Wang et al. 2017	A novel peat biochar supported catalyst for the transesterification reaction	Out of scope - a study not related to our work	evaluation of biodiesel production from soybean oil
Chu et al. 2017	Contrasting Effects of Cattle Manure Applications and Root-Induced Changes on Heavy Metal Dynamics in the Rhizosphere of Soybean in an Acidic Haplic Fluvisol: A Chronological Pot Experiment	Out of scope - a study not related to our work	the study did not include biochar
Rogovska et al. 2017	Biochar effect on severity of soybean root disease caused by Fusarium virguliforme	Out of scope - a study not related to our work	other parameters were evaluated
Ahmad et al. 2017	Biochar-induced changes in soil properties affected immobilization/mobilization of metals/metalloids in contaminated soils	Study evaluated the effectiveness of biochar derived from soybean residues
Copley et al. 2017	Biochar Amendment Modifies Expression of Soybean and Rhizoctonia solani Genes Leading to Increased Severity of Rhizoctonia Foliar Blight	Out of scope - a study not related to our work	other parameters were evaluated
Servin et al. 2017	Exposure of agricultural crops to nanoparticle CeO2 in biochar-amended soil	Out of scope - a study not related to our work
Yang et al. 2017	Simultaneous reductive and sorptive removal of Cr(VI) by activated carbon supported beta-FeOOH	Out of scope - a study not related to our work
Sethupathi et al. 2017	Biochars as Potential Adsorbers of CH4, CO2 and H2S	Study evaluated the effectiveness of biochar derived from soybean residues
Lychuk et al. 2017	Evaluation of climate change impacts and effectiveness of adaptation options on crop yield in the Southeastern United States	Out of scope - a study not related to our work	Modeling
