# Supplementary material
Source: MDPI journal article supplement (https://www.mdpi.com/2073-4395/11/11/2108)
Supplement: s1 [file s1 › Supplementary Material Word file.xlsx]

## Sheet: Biochar efficiency
							Dose	Biochar	Yield 2019	Yield 2020
				BA: sunflower husks			0	BA	1.82318	2.01
				BB: wooden chips				BB	1.925	2.09233
							40	BA	1.96379	2.92466
								BB	2.52253	3.04806
							60	BA	3.81966	3.81967
								BB	3.74404	3.85667
							80	BA	2.64076	3.09192
								BB	3.23	3.54575
						US$	85.33		368	342
							price biochar		price soya 2019	price soya 2020
							Cost of biochar		Soybean crop income
							biochar price	biowęgiel	Soyben price in 2019 year	Soyben price in 2020 year	mean
								BA	670.93	687.42	679.175
							3.4132		722.674	1000.23	861.454
							5.1198		1405.64	1306.33	1355.98
							6.8264		971.8	1057.44	1014.62
							0	BB	708.4	715.578	711.989
				(			3.4132		928.29	1042.44	985.363
							5.1198		1377.81	1318.98	1348.39
							6.8264		1188.64	1212.64	1200.64

## Sheet: Income and costs
Biochar doses Mg/há		40	60	80
Price 1 Mg/ha soy 2019		368 US$
Price 1 Mg/ha soy 2020		342 US$
Biochar price 320 PLN		85.33 US$
Seed material proce		197.3 US$				BA	sunflower husk				BB	wooden chips
					Dose	Income	Costs	Results		Dose	Income	Costs	Results
					0 Mg/ha	679.175	501.25	177.925		0Mg/ha	711.989	501.25	210.739
DIRECT COSTS	Unit	Amount / ha	Price	Cost/ ha	40Mg/ha	861.454	3914.45	-3053		40Mg/ha	985.363	3914.45	-2929.09
"Abelin" seed inoculated with nodule bacteria	j.s. 160.000 / seeds	4	49.3	197.2	60Mg/ha	1355.98	5621.05	-4265.07		60Mg/ha	1348.39	5621.05	-4272.66
					80Mg/ha	1014.62	7327.65	-6313.03		80Mg/ha	1200.64	7327.65	-6127.01
Biochar costs		40	85.33	3413.2
		60	85.33	5119.8
		80	85.33	6826.4
INDIRECT COSTS	Unit	Amount/ ha	Price	Cost/ ha
Services: the use of a combine harvester	$	1	104	104
Fuel	l	65	1.15	74.75
Oils and grease (7% of fuel cost)				5.3
Other				120
TOTAL INDIRECT COSTS				304.05
in US$	year 2019	year 2020
Single area payment	125.77	129.01	127.39
Subsidies for grain legumes	204.21	193.2	198.705
Subsidies for seed material	86.65	90.64	88.645
Greening surcharges	84.41	86.36	85.385
	501.04	499.21	500.125
in US$			Income/sales	Costs
		conventional fertilizer	3725.12	861.6
		0Mg/ha	678.05	501.25
		40Mg/ha
		60Mg/ha
		80Mg/ha
DIRECT COSTS	Unit	Amount / ha	Price	Costs / ha
"Abelin" seed inoculated with nodule bacteria	j.s. 160.000/seeds	4	49.3	197.2	Ammonium nitrate: 150 kg/ha - 2019 - 1380 zł/t
Fertilizing				$360.35	Triple superphosphate: 160 kg/ha - 2019 - 1480 zł/t
Lime		1.7	$80	$136.00	Potassium sulfate: 150 kg/ha.- 2019 - 2650 zł/t
Ammonium nitrate		0.15	368	55.2
Triple superphosphate		0.16	394.67	63.1472
Potassium sulfate:	t	0.15	706.67	106
DIRECT COSTS	$ / ha			$557.5
INDIRECT COSTS	Jednostka miary	Ilość / ha	Cena	Koszt / ha
Services: the use of a combine harvester	$	1	$104	$104
Fuel	l	65	$1.15	$74.75
Oils and grease (7% of fuel cost)				5.3
Other	$			120
TOTAL INDIRECT COSTS				$304.05
TOTAL COSTS PER 1 há				$861.60
PRODUCTION VALUE	t	2.5	400	1000
Income from production WITHOUT SUBSIDIES	$ / ha			$138.40
Single area payment (2019)	$ / ha			127.39
Subsidies for grain legumes (up to75 ha)	$ / ha			198.705
Subsidies for seed material	$ / ha			88.645
Greening surcharges	$ / ha			85.385
TOTAL INCOME WITH SURCHARGES	$ / ha			$638.53

## Sheet: Payback period
in US$	Biochar
Dose of biochar	Income	Costs
0 Mg/há	695.582	501.25
40 Mg/ha	923.409	3914.45
60 Mg/ha	1352.19	5621.05
80 Mg/ha	1107.63	7327.65
in US$	year 2019	year 2020
Single area payment	125.77	129.01	127.39
Payment for legumes	204.21	193.2	198.705
Subsidies for seed material	86.65	90.64	88.645
Greening subsidies	84.41	86.36	85.385
			500.125
in US$	biochar
Dose	Income	Costs	Results
conventional fertilizer	1387.63	1221.95	165.68
biochar 0 Mg/ha	1195.71	501.25	694.457
biochar 40Mg/ha	2069.92	3914.45	-1844.53
biochar 60Mg/ha	2798.84	5621.05	-2822.21
biochar 80Mg/ha	2383.1	7327.65	-4944.55
Dose	Income	Costs	Results	in US$
conventional fertilizer once a year	1387.63	861.6	526.03
conventional fertilizer twice a year	1387.63	1221.94	165.69
Dose	Income	Costs	Results	in US$
conventional fertilizer	1387.63	1221.94	165.69
biochar 0 Mg/ha	1195.71	501.25	694.457
biochar 40Mg/ha	2069.92	3914.45	-1844.53
biochar 60Mg/ha	2798.84	5621.05	-2822.21
biochar 80Mg/ha	2383.1	7327.65	-4944.55
2 i 3 years scenario (in US$)
Dose	Income		Costs		Results		income r+2	Costs r+2	Results
	2019	2019+2020	2019	2019+2020	2019	2019+2020			2019+2		DR (dyscoun rate)	0.09
conventional fertilizer	1421.04	2877.85	861.6	1723.2	559.44	1154.65	4162.88	2584.79	1578.09		r-year
biochar 40 Mg/ha	1904.36	4139.84	3914.45	4415.7	-2010.09	-275.861	6209.76	4916.95	1292.81
biochar 60 Mg/ha	2894.8	5625.52	5621.05	6122.3	-2726.25	-496.778	8396.53	6623.55	1772.98
biochar 80 Mg/ha	2337.41	4766.19	7327.65	7828.9	-4990.24	-3062.71	7149.29	8330.15	-1180.86
Dose/Results	2019	2019+1r	2019+2r	in US$
conventional fertilizer	559.44	1154.65	1578.09
biochar 40 Mg/ha	-2010.09	-275.861	1292.81
biochar 60 Mg/ha	-2726.25	-496.778	1772.98
biochar 80 Mg/ha	-4990.24	-3062.71	-1180.86
Dose/Results	2019	2019+1r	2019+2r	2019+3r	2019+4r
conventional fertilizer	559.44	1059.31	1328.25	1218.58	1117.96
biochar 40 Mg/ha	-2010.09	-253.083	1088.13	998.286	915.859
biochar 60 Mg/ha	-2726.25	-455.76	1492.28	1369.07	1256.02
biochar 80 Mg/ha	-4990.24	-2809.82	-993.907	-911.841	-836.552
Cummulative result	2019	2019+1r	2019+2r	2019+3r	2019+4r
conventional fertilizer	559.44	1618.75	2947	4165.57	5283.53
biochar 40 Mg/ha	-2010.09	-2263.17	-1175.04	-176.756	739.102
biochar 60 Mg/ha	-2726.25	-3182.01	-1689.73	-320.66	935.365
biochar 80 Mg/ha	-4990.24	-7800.06	-8793.97	-9705.81	-10542.4
Year	0	1	2	3	4
biochar 40 Mg/ha	-2010.09	-253.083	1088.13	998.286	915.859
biochar 40 Mg/ha	-2010.09	-2263.17	-1175.04	-176.756	739.102
biochar 60 Mg/ha	-2726.25	-455.76	1492.28	1369.07	1256.02
biochar 60 Mg/ha	-2726.25	-3182.01	-1689.73	-320.66	935.365

## Sheet: Breakeven  price 
Costs of soybean seeds US$		197.2			Price -biochar	10	20	30	40	50	60	70	80
Indirect costs US$		$304.05			Costs	901.25	1301.25	1701.25	2070.05	2501.25	2901.25	3301.25	3701.25
Biochar dose application Mg/há		40			Income	2069.92	2069.92	2069.92	2069.92	2069.92	2069.92	2069.92	2069.92
		60
		80
	40 Mg/ha
	Expense	Income
10	901.25	2069.92
20	1301.25	2069.92
30	1701.25	2069.92
39.22	2070.05	2069.92
50	2501.25	2069.92
60	2901.25	2069.92
70	3301.25	2069.92
80	3701.25	2069.92
	60 Mg/há
	Expense	Income
10	1101.25	2798.84
20	1701.25	2798.84
30	2301.25	2798.84		Dose	Breakeven price
38.29	2798.65	2798.84		40 Mg/ha	39.22
50	3501.25	2798.84		60 Mg/ha	38.29
60	4101.25	2798.84		80 Mg/ha
70	4701.25	2798.84
80	5301.25	2798.84
	80 Mg/há
	Expense	Income
10	1301.25	2383.1
18	1941.25	2383.1
23.53	2383.65	2383.1
35	3301.25	2383.1
50	4501.25	2383.1
60	5301.25	2383.1
70	6101.25	2383.1
80	6901.25	2383.1

## Sheet: Soil Carbon sequestration
			BA					Sunflower husks
carbon price (USDt CO2)\dose	Income	Costs	Results	Income	Costs	Results	Income	Costs	Results
	40			60			80
5	2375.26	3914.45	-1539.19	3421.29	5621.05	-2199.76	3046.31	7327.65	-4281.34
15	3196.6	3914.45	-717.853	4653.29	5621.05	-967.757	4688.98	7327.65	-2638.67
25	4017.93	3914.45	103.48	5286.19	5621.05	-334.856	6331.64	7327.65	-996.008
35	4839.26	3914.45	924.813	7117.29	5621.05	1496.24	7974.31	7327.65	646.659
			BB					Wooden chips
carbon price (USDt CO2)\dose	Income	Costs	Results	Income	Costs	Results	Income	Costs	Results
	40			60			80
5	2570.51	3914.45	-1343.94	3385.29	5621.05	-2235.76	3331.75	7327.65	-3995.9
15	3361.04	3914.45	-553.407	4571.09	5621.05	-1049.96	4912.82	7327.65	-2414.83
25	4151.58	3914.45	237.126	5756.89	5621.05	135.844	6493.88	7327.65	-833.766
			BA year 2					Sunflower husks
	Income	Costs	Results	Income	Costs	Results	Income	Costs	Results
	40			60			80
5	4750.53	4415.7	334.826	6842.59	6122.3	720.286	6092.62	7828.9	-1736.28
15	6393.19	4415.7	1977.49	9306.59	6122.3	3184.29	9377.95	7828.9	1549.05
25	8035.86	4415.7	3620.16	10572.4	6122.3	4450.09	12663.3	7828.9	4834.38
			BB year 2					Wooden chips
	Income	Costs	Results	Income	Costs	Results	Income	Costs	Results
	40			60			80
5	5141.02	4415.7	725.319	6770.59	6122.3	648.289	6663.5	7828.9	-1165.4
15	6722.09	4415.7	2306.39	9142.19	6122.3	3019.89	9825.63	7828.9	1996.73
25	8303.15	4415.7	3887.45	11513.8	6122.3	5391.49	12987.8	7828.9	5158.87

## Sheet: US$ 10,20,30 C sequestration
			BA					Sunflower husks
	Income	Costs	Results	Income	Costs	Results	Income	Costs	Results
	40			60			80
10	2785.93	3914.45	-1128.52	4037.29	5621.05	-1583.76	3867.64	7327.65	-3460.01
20	4447.96		4447.96	5269.29		5269.29	5510.31	7327.65	-1817.34
30	5269.29		5269.29	6501.29		6501.29	7152.98	7327.65	-174.674
			BB					Wooden chips
	Income	Costs	Results	Income	Costs	Results	Income	Costs	Results
	40			60			80
10	2965.78	3914.45	-948.674	3978.19	5621.05	-1642.86	4912.82	7327.65	-2414.83
20	3756.31		3756.31	5163.99		5163.99	5703.35		5703.35
30	4546.84		4546.84	6349.79		6349.79	7284.42		7284.42
		BA year 2						Sunflower husk
	Income	Costs	Results	Income	Costs	Results	Income	Costs	Results
	40			60			80
10	5571.86	4415.7	1156.16	8074.59	6122.3	1952.29	7735.28	7828.9	-93.6154
20	8895.92	4415.7	4480.22	10538.6	6122.3	4416.29	11020.6	7828.9	3191.72
30	10538.6	4415.7	6122.89	13002.6	6122.3	6880.29	14306	7828.9	6477.05
		BB year 2						Wooden chips
	Income	Costs	Results	Income	Costs	Results	Income	Costs	Results
	40			60			80
10	5931.55	4415.7	1515.85	7956.39	6122.3	1834.09	9825.63	7828.9	1996.73
20	7512.62	4415.7	3096.92	10328	6122.3	4205.69	11406.7	7828.9	3577.8
30	9093.69	4415.7	4677.99	12699.6	6122.3	6577.29	14568.8	7828.9	6739.93
Dose in Mg/há	40		60		80
	BA	BB	BA	BB	BA	BB
10	1156.16	1515.85	1952.29	1834.09	-93.6154	1996.73
20	4480.22	3096.92	4416.29	4205.69	3191.72	3577.8
30	6122.89	4677.99	6880.29	6577.29	6477.05	6739.93
US$:10, 20, 30,
